# Supplementary material for: CrPS4 Nanoflakes as Stable Direct-Band-Gap 2D Materials for Ultrafast Pulse Laser Applications
Source: MDPI journal article supplement (doi:10.3390/nano13061128), 2023-03-22
Supplement: s1 [file s1]

# Supplementary Materials

## CrPS<sub>4</sub> Nanoflakes as Stable Direct-Band-Gap 2D Materials for Ultrafast Pulse Laser Applications

Wenyao Zhang<sup>1,†</sup>, Yu Zhang<sup>1,†</sup>, Xudong Leng<sup>2</sup>, Qun Jing<sup>2</sup>, Qiao Wen<sup>1,\*</sup>

<sup>1</sup> Key Laboratory of Optoelectronic Devices and Systems of Ministry of Education and Guangdong Province, College of Physics and Optoelectronic Engineering, Shenzhen University, Shenzhen 518060, China

<sup>2</sup> Xinjiang Key for Laboratory of Solid State Physics and Devices, Xinjiang University, 777 Huarui Street, Urumqi 830017, China

\* Correspondence: wenqiao@szu.edu.cn

† These authors contributed equally to this work.

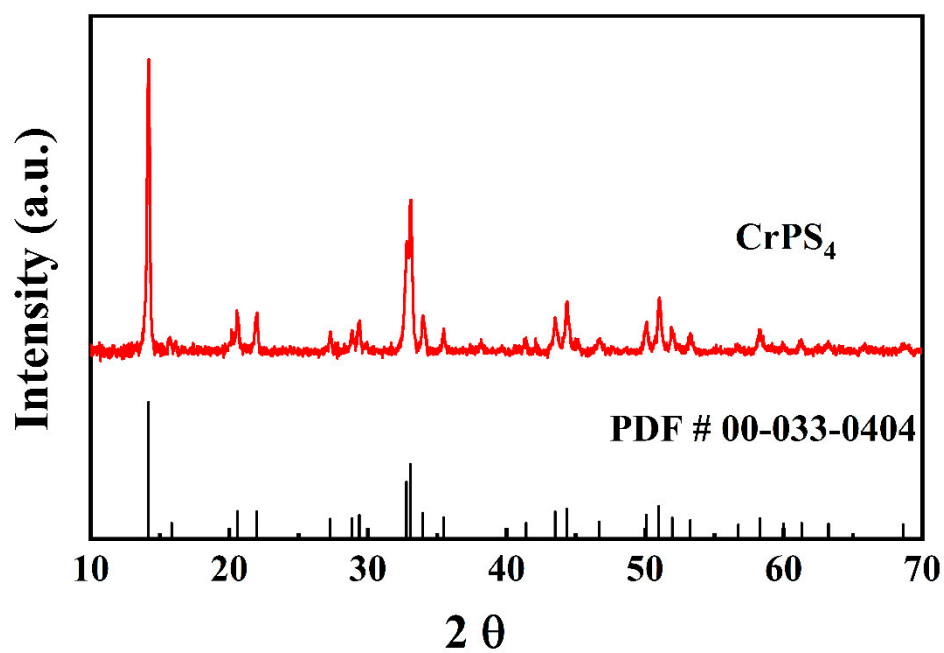

**Figure S1.** The diffraction pattern from  $\text{CrPS}_4$  sample was analyzed using X'pert Highscore Plus 3.0

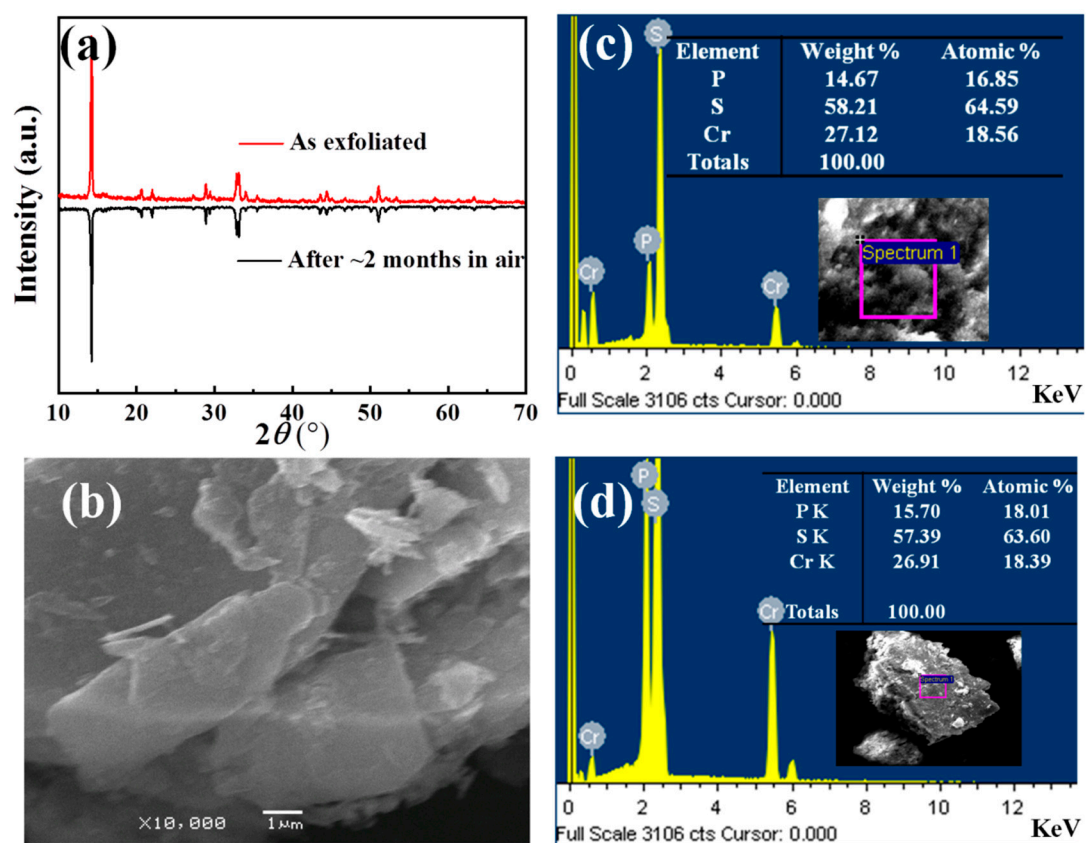

**Figure S2.** (a) XRD spectra of CrPS<sub>4</sub> as exfoliated and after ~2 months in air; (b) SEM image for CrPS<sub>4</sub> flakes after ~2 months in air; (d) EDX spectra with an atomic ratio of Cr, P and S elements for CrPS<sub>4</sub> flakes as exfoliated and after ~2 months in air.

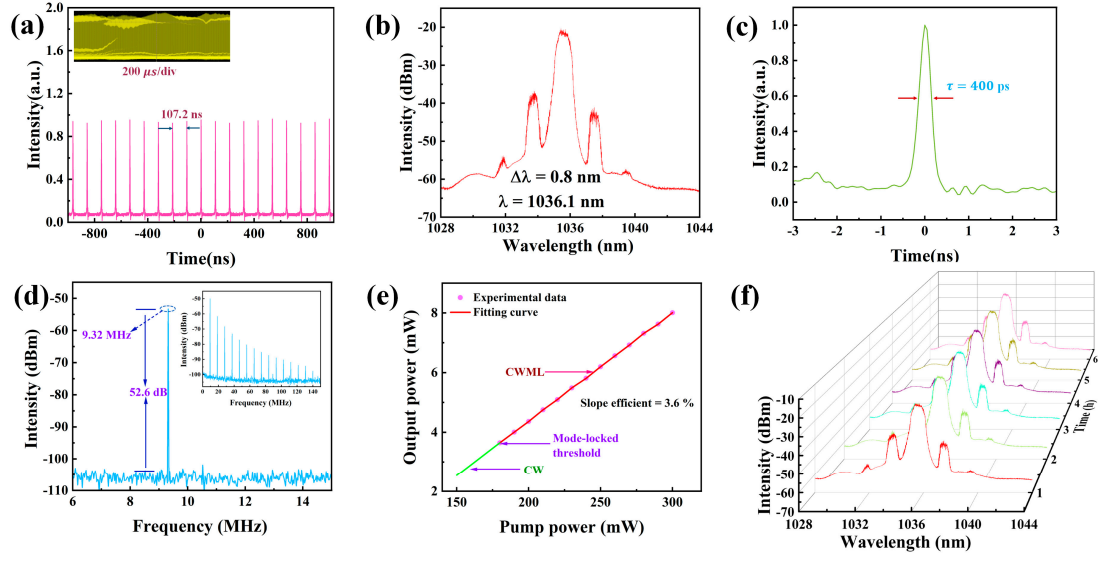

**Figure S3.** Classical mode-locked output characteristics. (a) Pulse train; (b) Optical Spectrum; (c) Pulse width; (d) RF spectrum (inset: broadband RF spectrum); (e) Relative change of output power and pump power; (f) Long-time spectroscopic measurement (1 hour interval, 6 hours in total).

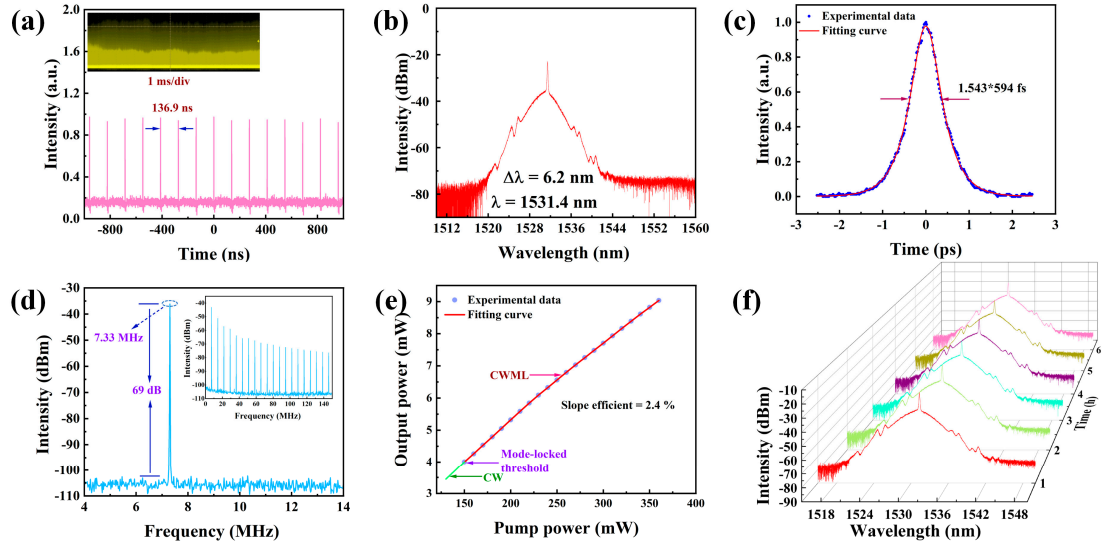

**Figure S4.** Classical mode-locked output characteristics. (a) Pulse train; (b) Optical Spectrum; (c) Pulse width; (d) RF spectrum (inset: broadband RF spectrum); (e) Relative change of output power and pump power; (f) Long-time spectroscopic measurement (1 hour interval, 6 hours in total).

**Table S1.** Comparison of SA with other 2D materials at 1  $\mu\text{m}$  laser output parameters.

| SA type                                       | Pulse width<br>(ps) | Output<br>power(mW) | Pulse<br>energy(nJ) | Peak<br>power(W) | Ref.             |
|-----------------------------------------------|---------------------|---------------------|---------------------|------------------|------------------|
| Graphene                                      | 580                 | 0.37                | 0.41                | 0.71             | [54]             |
| Graphene<br>oxide                             | 2300                | 0.19                | 0.18                | 0.08             | [64]             |
| BP                                            | 3.2                 | 27                  | 2.7                 | 830              | [65]             |
| BP                                            | 400                 | 32.5                | 0.7                 | 1.75             | [66]             |
| Ti <sub>3</sub> C <sub>2</sub> T <sub>x</sub> | 480                 | 9                   | 0.47                | 1                | [67]             |
| WS <sub>2</sub>                               | 630                 | 7.6                 | 1.36                | 2.14             | [56]             |
| Mo <sub>2</sub> C                             | 350                 | 7.7                 | 0.38                | 1.09             | [55]             |
| MoSe <sub>2</sub>                             | 664.5               | 2                   | 0.13                | 0.19             | [68]             |
| MoS <sub>2</sub>                              | 656                 | 2.37                | 0.35                | 0.53             | [69]             |
| MoS <sub>2</sub>                              | 800                 | 9.3                 | 1.41                | 1.76             | [70]             |
| Bi <sub>2</sub> Te <sub>3</sub>               | 230                 | 0.86                | 0.60                | 2.6              | [53]             |
| CrPS <sub>4</sub>                             | 298                 | 10.63               | 1.174               | 3.94             | <b>This work</b> |

**Table S2.** Comparison of SA with other 2D materials at 1.5  $\mu\text{m}$  laser output parameters.

| SA type                          | Pulse width<br>(fs) | Output<br>power(mW) | Pulse<br>energy(pJ) | Peak<br>power(W) | Ref.             |
|----------------------------------|---------------------|---------------------|---------------------|------------------|------------------|
| Graphene                         | 756                 | 2                   | 1120                | 1478             | [7]              |
| BP                               | 2180                | 0.077               | 4.9                 | 2.3              | [71]             |
| BP                               | 940                 | 2.6                 | 1129                | 1201             | [57]             |
| Ti <sub>3</sub> CNT <sub>x</sub> | 159                 | 3                   | 410                 | 2578.6           | [67]             |
| Ti <sub>3</sub> CNT <sub>x</sub> | 660                 | 0.05                | 3                   | 4.9              | [72]             |
| MoS <sub>2</sub>                 | 200                 | 1                   | 68.8                | 2300             | [73]             |
| MoS <sub>2</sub>                 | 521                 | 0.79                | 31.3                | 60.1             | [74]             |
| WS <sub>2</sub>                  | 21100               | 1.8                 | 220                 | 10.4             | [56]             |
| Mo <sub>2</sub> C                | 290                 | 6.831               | 860                 | 2982             | [55]             |
| In <sub>2</sub> Se <sub>3</sub>  | 215                 | 2                   | 270                 | 1255.8           | [75]             |
| CrPS <sub>4</sub>                | 500                 | 6.1                 | 893                 | 1786             | <b>This work</b> |
